# Supplementary material
Source: Springer Nature journal article supplement (https://www.springermedizin.de/resource/supplementary/12990_2012_507_MOESM4_ESM.pdf/9613448)

**A**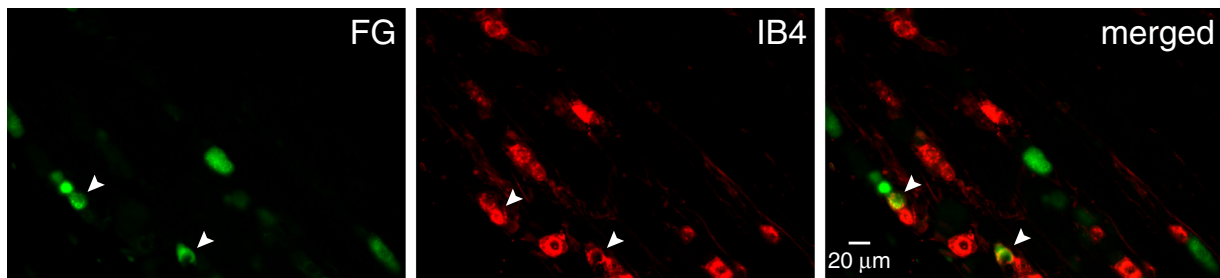**B**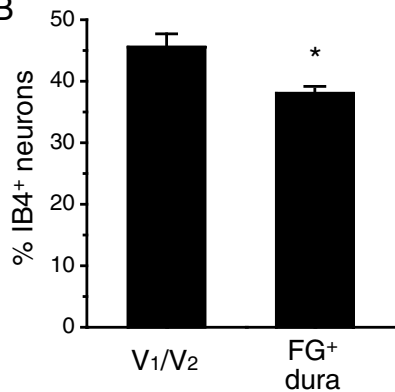**C**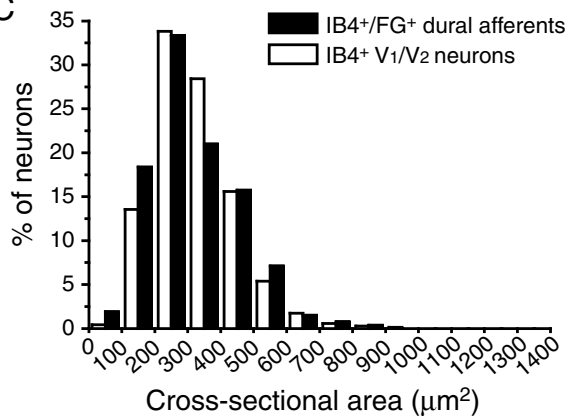**D**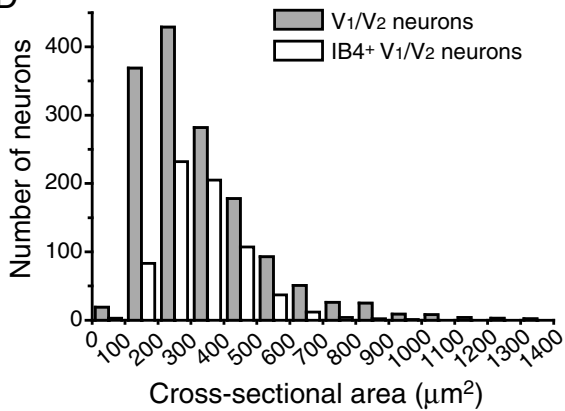**E**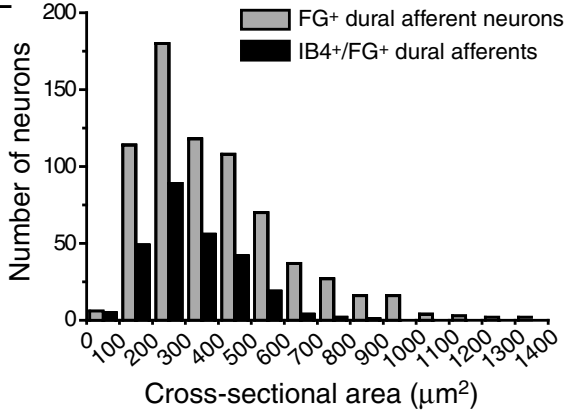

Supplement: MOESM4 [file 9613448]
